# Supplementary material for: FDA-Approved Small Molecules in 2022: Clinical Uses and Their Synthesis
Source: MDPI journal article supplement (doi:10.3390/pharmaceutics14112538), 2022-11-21
Supplement: s1 [file s1]

# Supplementary Materials: FDA-Approved Small Molecules in 2022: Clinical uses and Their Synthesis

Davide Benedetto Tiz \*, Luana Bagnoli, Ornelio Rosati, Francesca Marini, Claudio Santi and Luca Sancineto\*

## Content:

|                                                                                   |           |
|-----------------------------------------------------------------------------------|-----------|
| Table describing the names of the 15 molecules approved by FDA in 2022 (Table S1) | Pages 1-4 |
| Global sales forecast in 2026 (*2028 for some drugs) (Figure S1)                  | Page 4    |
| References                                                                        | Page 5    |

| Name         | Chemical structure                                                                  | Therapeutic indication                       |
|--------------|-------------------------------------------------------------------------------------|----------------------------------------------|
| Daridorexant | 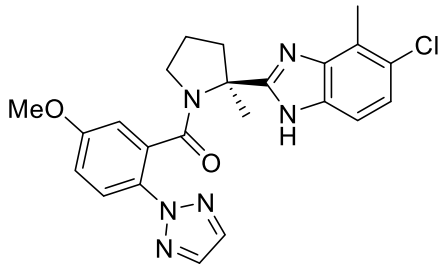  | insomnia                                     |
| Abrocitinib  |  | atopic dermatitis (AD)                       |
| Mitapivat    |  | hereditary hemolytic anemias                 |
| Pacritinib   |  | high-risk primary or secondary myelofibrosis |

|                                                          |                                                                                     |                                                                                           |
|----------------------------------------------------------|-------------------------------------------------------------------------------------|-------------------------------------------------------------------------------------------|
| <b>Ganaxolone</b>                                        | 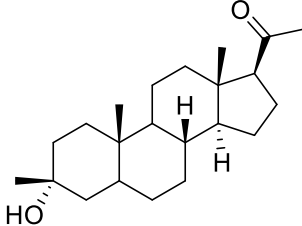   | seizures in cyclin-dependent kinase-like 5 deficiency disorder                            |
| <b>Lutetium (<sup>177</sup>Lu) vipivotide tetraxetan</b> |   | specific membrane antigen-positive metastatic castration-resistant prostate cancer        |
| <b>Oteseconazole</b>                                     |  | recurrent vulvovaginal candidiasis (RVVC) in females                                      |
| <b>Mavacamten</b>                                        |  | obstructive hypertrophic cardiomyopathy                                                   |
| <b>Vonoprazan</b>                                        |  | <i>Helicobacter pylori</i> infection (in combination with amoxicillin and clarithromycin) |

|                              |                                                                                     |                                                                                                                       |
|------------------------------|-------------------------------------------------------------------------------------|-----------------------------------------------------------------------------------------------------------------------|
| <b>Tapiranof</b>             | 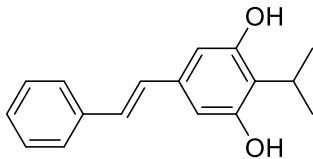   | plaque psoriasis                                                                                                      |
| <b>Deucravacitinib</b>       |    | plaque psoriasis                                                                                                      |
| <b>Gadopiclenol</b>          |   | detect and visualize lesions, together with MRI, with abnormal vascularity in the central nervous system and the body |
| <b>Oomidenepag isopropyl</b> |  | reducing elevated intraocular pressure in patients with open-angle glaucoma or ocular hypertension                    |
| <b>Taurursodiol</b>          |  | amyotrophic lateral sclerosis (ALS) in combination with sodium phenylbutyrate                                         |

|             |                                                                                   |                                 |
|-------------|-----------------------------------------------------------------------------------|---------------------------------|
| Futibatinib | 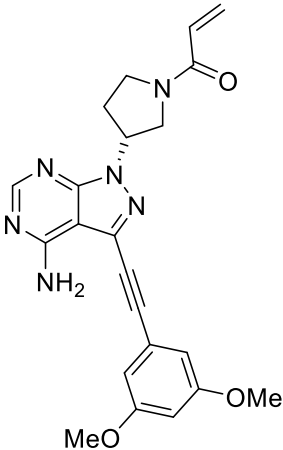 | intrahepatic cholangiocarcinoma |
|-------------|-----------------------------------------------------------------------------------|---------------------------------|

**Table S1.** Table describing the names of the 15 molecules approved by FDA in 2022. Their structures and therapeutic use are provided as well [1].

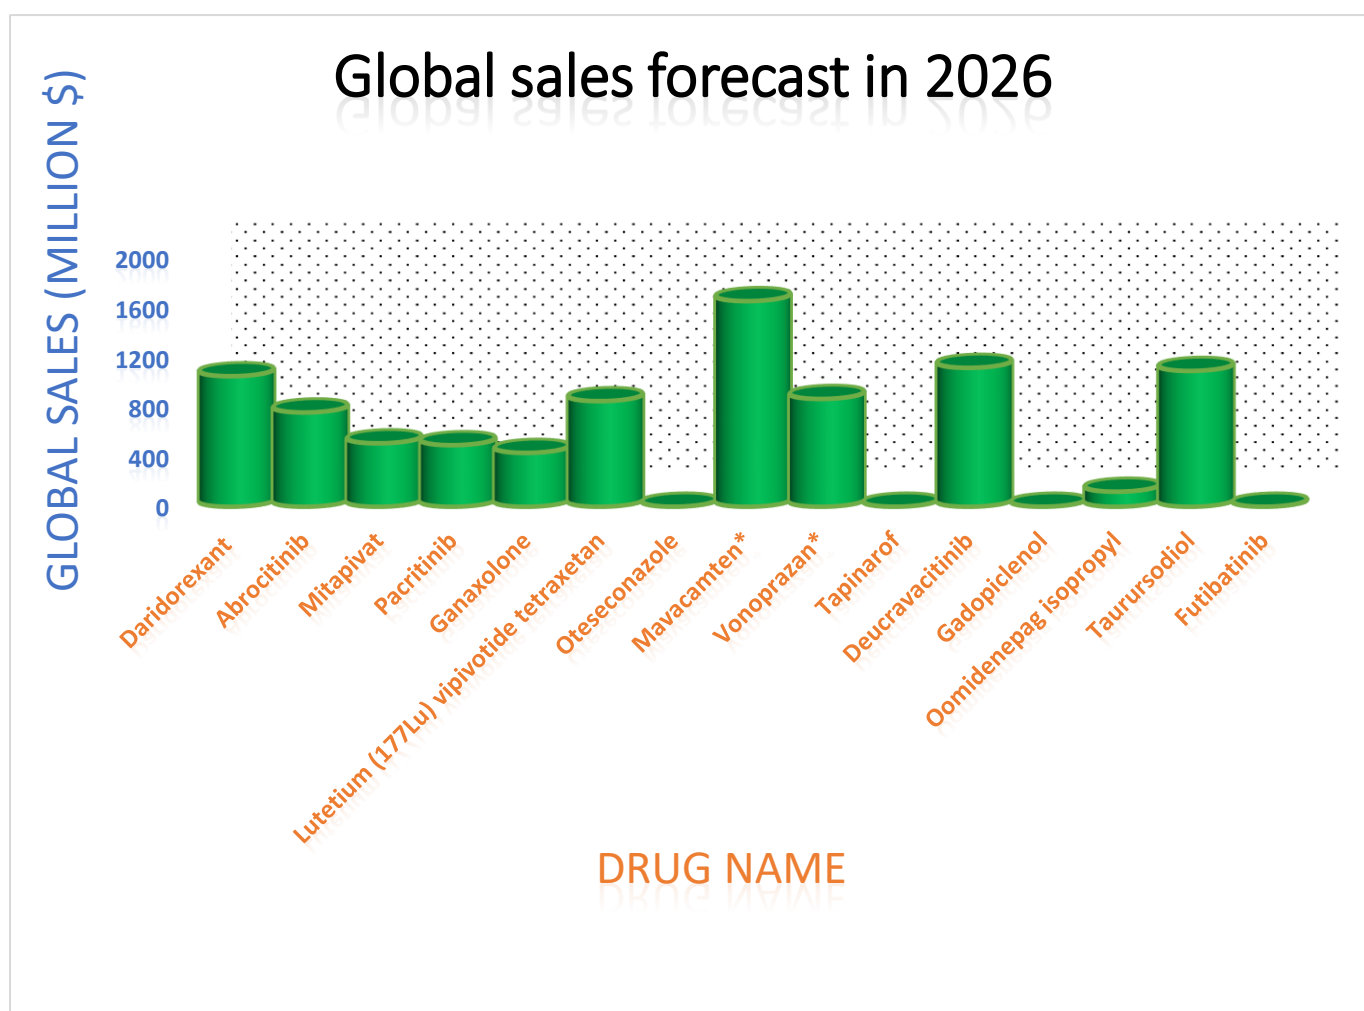

**Figure S1.** Forecasted global sales for 2022 FDA-approved drugs (in million \$ in 2026). Values for mavacamten and vonoprazan are meant for 2028. Data for oteseconazole, tapinarof, gadopicleanol, and futibatinib were not available [2-4].

**References:**

1. Novel Drug Approvals for 2022|FDA. Available online: <https://www.fda.gov/drugs/new-drugs-fda-cders-new-molecular-entities-and-new-therapeutic-biological-products/novel-drug-approvals-2022> (accessed on 24 October 2022).
2. Urquhart, L. FDA New Drug Approvals in Q1 2022. *Nat. Rev. Drug. Discov.* **2022**, *21*, 329–329, doi:10.1038/d41573-022-00063-9.
3. Urquhart, L. FDA New Drug Approvals in Q2 2022. *Nat. Rev. Drug. Discov.* **2022**, *21*, 550–550, doi:10.1038/d41573-022-00123-0.
4. Brown, A. FDA New Drug Approvals in Q3 2022. *Nat. Rev. Drug Discov.* **2022**, doi:10.1038/d41573-022-00174-3.
